# Supplementary material for: Rice Germ Ameliorated Chronic Unpredictable Mild Stress-Induced Depressive-like Behavior by Reducing Neuroinflammation
Source: MDPI journal article supplement (doi:10.3390/nu14245382), 2022-12-18
Supplement: s1 [file s1]

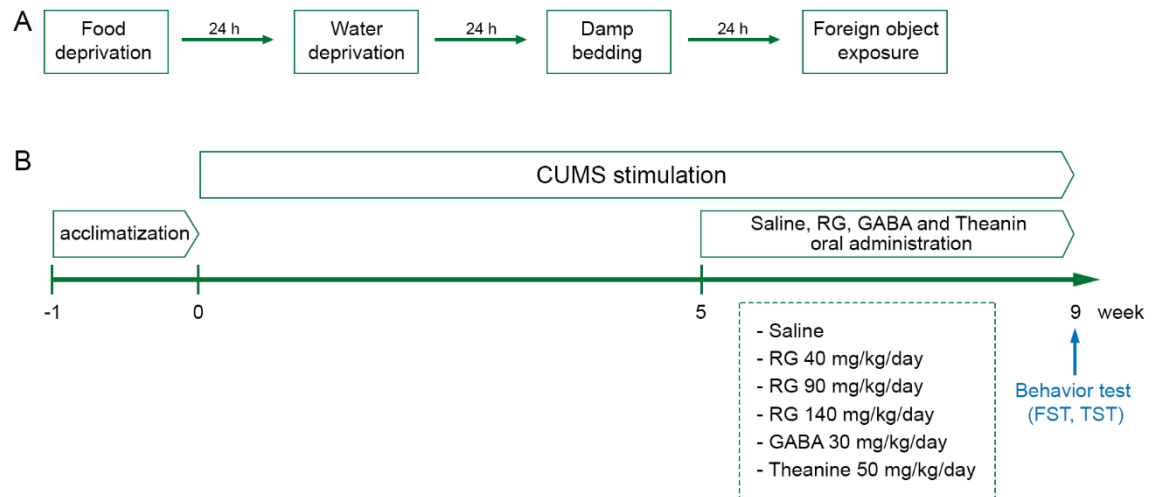

**Figure S1. Schematic diagram of CUMS procedure and animal experimental design.** (A) It is a schematic diagram showing stressors to induce CUMS. Each stressor was provided for 24 h. (B) After a one-week acclimatization period, the CUMS procedure was conducted for 5 weeks. After the CUMS procedure for 5 weeks, RG (40, 90 and 140 mg/kg/day), GABA (30 mg/kg/day), and theanine (50 mg/kg/day) were administered orally at the same time as the CUMS procedure for 4 weeks. Behavioral tests such as FST and TST were conducted at the last oral administration.

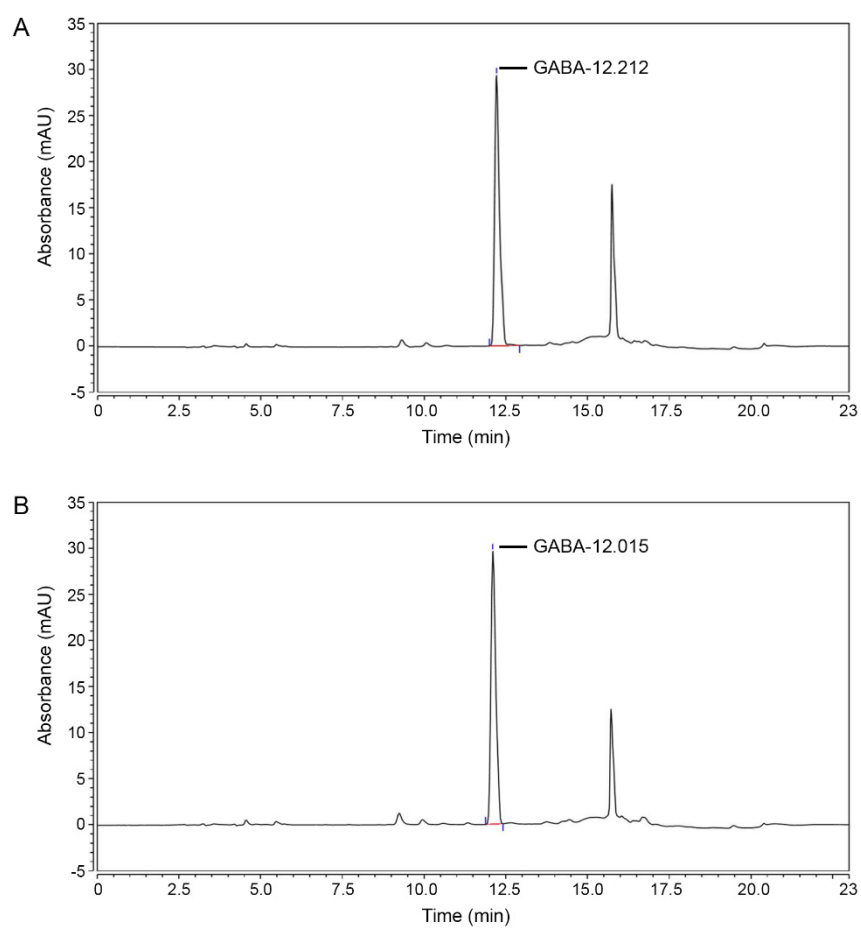

**Figure S2. RG chemical analysis.** (A and B) HPLC chromatograph of GABA standard (A) and GABA in RG (B).

**Table S1. List of antibodies for ELISA and DAB staining.**

| Antibody       | Company                      | Catalog no. | Dilution rate                                                       |                                                                                 |
|----------------|------------------------------|-------------|---------------------------------------------------------------------|---------------------------------------------------------------------------------|
|                |                              |             | ELISA                                                               | DAB                                                                             |
| TNF- $\alpha$  | Novus<br>Biologicals         | NBPI-19532  | 1:500<br>(0.2 $\mu$ L anti-TNF- $\alpha$ :<br>100 $\mu$ L PBS/well) | 1:200<br>(0.5 $\mu$ L anti-TNF- $\alpha$ :<br>100 $\mu$ L normal serum/tissue)  |
| IL-6           | Santa Cruz<br>Biotechnology  | sc-57315    | 1:500<br>(0.2 $\mu$ L anti-IL-6 :<br>100 $\mu$ L PBS/well)          | 1:100<br>(1 $\mu$ L anti-IL-6 :<br>100 $\mu$ L normal serum/tissue)             |
| CD206          | Novus<br>Biologicals         | NBPI-90020  | -                                                                   | 1:200<br>(0.5 $\mu$ L anti-CD206 :<br>100 $\mu$ L normal serum/tissue)          |
| CD86           | Santa Cruz<br>Biotechnology  | sc-19627    | -                                                                   | 1:50<br>(2 $\mu$ L anti-CD86 :<br>100 $\mu$ L normal serum/tissue)              |
| NF- $\kappa$ B | Cell Signaling<br>Technology | 8242S       | -                                                                   | 1:200<br>(0.5 $\mu$ L anti-NF- $\kappa$ B :<br>100 $\mu$ L normal serum/tissue) |

**Table S2. List of primer for qRT-PCR.**

| Gene                          |         | Primers                      |
|-------------------------------|---------|------------------------------|
| <i>Actb</i>                   | Forward | 5'-CCGTAAAGACCTCTATGCCAAC-3' |
|                               | Reverse | 5'-GCAGTAATCTCCTTCTGCATCC-3' |
| <i>ASC</i>                    | Forward | 5'-GAAGGACAGTACCAGGCAGTTC-3' |
|                               | Reverse | 5'-AGGATGGAACAAAGCTGAAGAG-3' |
| <i>Caspase-1</i>              | Forward | 5'-AGGACATCCTTCATCCTCAGAA-3' |
|                               | Reverse | 5'-TTCTAAAGGGCAAACTTGAGG-3'  |
| <i>GSDMD</i>                  | Forward | 5'-TCATGTGTCAACCTGTCAATCA-3' |
|                               | Reverse | 5'-GACTTTGAAGGAGCCAAAACAC-3' |
| <i>IL-1<math>\beta</math></i> | Forward | 5'-ACCAAGCAACGACAAAATACCT-3' |
|                               | Reverse | 5'-CCGTCTTTCATTACACAGGACA-3' |
| <i>IL-18</i>                  | Forward | 5'-GAAGACTCTTGCGTCAACTTCA-3' |
|                               | Reverse | 5'-CTGATTCCAGGTCTCCATTTTC-3' |
| <i>NLRP-3</i>                 | Forward | 5'-GAGGCCAAAAGGAAGGAGTATT-3' |
|                               | Reverse | 5'-GGACCTCATTCTCTTGGATCAG-3' |

**Table S3.** Retention time of GABA standard and RG.

| Sample        | Retention time (min) |
|---------------|----------------------|
| GABA Standard | 12.26 ± 0.092        |
| RG            | 12.10 ± 0.001        |
